# Supplementary material for: Re-refinement of the spliceosomal U4 snRNP core-domain structure
Source: PubMed Central journal article supplement (PMC4756616; doi:10.1107/s2059798315022111), 2016-01-01
Supplement: d-72-00131-sup1.pdf [file d-72-00131-sup1.pdf]

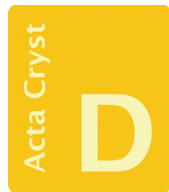

STRUCTURAL  
BIOLOGY

**Volume 72 (2016)**

**Supporting information for article:**

**Re-refinement of the spliceosomal U4 snRNP core-domain  
structure**

**Jade Li, Adelaine K. Leung, Yasushi Kondo, Chris Oubridge and Kiyoshi Nagai**

## Scheme: Model/refine the snRNA Stems

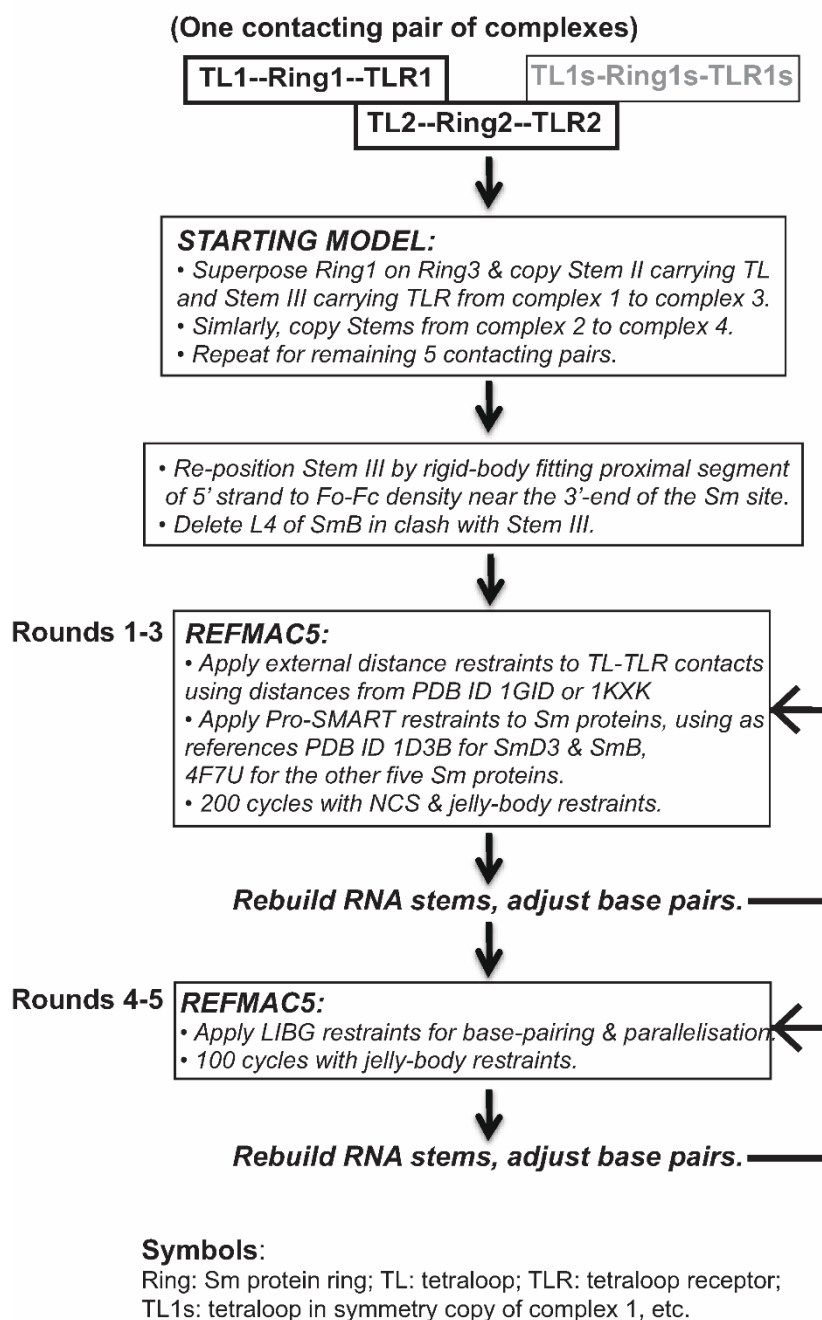

**Figure S1** Steps used to re-model and refine the flanking stems in §2.5
